# Supplementary material
Source: PubMed Central journal article supplement (PMC6697619)
Supplement: NIHMS1528227-supplement-1.pdf [file NIHMS1528227-supplement-1.pdf]

## Supplemental Figures and Legends

### **The Natural Product Butylcycloheptyl Prodiginine Binds Pre-miR-21, Inhibits Dicer-Mediated Processing of Pre-miR-21, and Blocks Cellular Proliferation**

Joe S. Matarlo<sup>1</sup>, Lauren R.H. Krumpke<sup>1,2</sup>, William F. Heinz<sup>3</sup>, Daniel Oh<sup>1</sup>, Shilpa R. Shenoy<sup>1,2</sup>, Cheryl L. Thomas<sup>1</sup>, Ekaterina I. Goncharova<sup>1,4</sup>, Stephen J. Lockett<sup>3</sup>, and Barry R. O'Keefe<sup>1,5,6 \*</sup>

<sup>1</sup>Molecular Targets Program, Center for Cancer Research, National Cancer Institute, National Institutes of Health, Frederick, MD 21702, USA; <sup>2</sup>Basic Science Program, Frederick National Laboratory for Cancer Research, Frederick, MD 21702, USA; <sup>3</sup>Optical Microscopy and Analysis Laboratory, Frederick National Laboratory for Cancer Research, Frederick, MD 21702, USA; <sup>4</sup>Biomedical Informatics and Data Science Directorate, Leidos Biomedical Research, Inc., Frederick National Laboratory for Cancer Research, Frederick, MD 21702, USA; <sup>5</sup>Natural Products Branch, Developmental Therapeutics Program, Division of Cancer Treatment and Diagnosis, National Cancer Institute, National Institutes of Health, Frederick, MD 21702, USA;

<sup>6</sup>Lead Contact.

- Figure S1:** Results of 3682 pure natural products screened *via* DSF to identify modulators of pre-miR-21 thermal stability *in vitro*. Related to Figure 1.
- Figure S2:** Cytotoxicity data on select pre-miR-21 modulating compounds. Related to Table 1.
- Figure S3:** Chemical structures of control compounds 5-fluorouracil (5-FU) and navitoclax. Related to Figure 1 and Table 1.
- Figure S4:** Differential scanning calorimetry of pre-miR-21 (30  $\mu$ M) with or without bPGN (300  $\mu$ M). Related to Figure 1.
- Figure S5:** Hexachlorophene and regorafenib were previously identified as Dicer inhibitors. Related to Figure 3.
- Table S1:** List of 32 active natural products identified from the 3682 natural product compounds screened *via* DSF for modulators of pre-miR-21 thermal stability *in vitro*. Related to Table 1.
- TableS2:** 41 predicted miR-21 target genes annotated from NanoString analysis. Related to Figure 5.

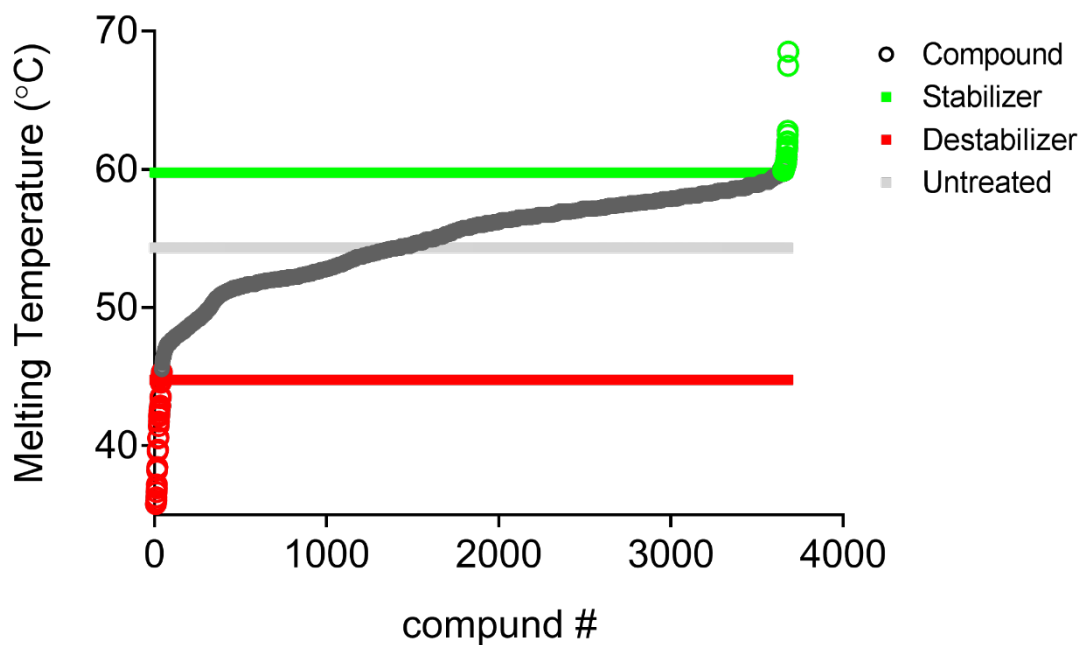

**Figure S1: Results of 3682 pure natural products screened *via* DSF to identify modulators of pre-miR-21 thermal stability *in vitro*, related to Figure 1.** A stabilizing control (spermidine, green) and destabilizing control (methoctramine, red) were used to calculate statistical significance to define hits. Compounds in green are stabilizing hits (increased melting temperature) while compounds in red had a destabilizing effect (decreased thermal temperature). A total of 32 compounds were found to significantly modulate pre-miR-21 thermal stability *in vitro*.

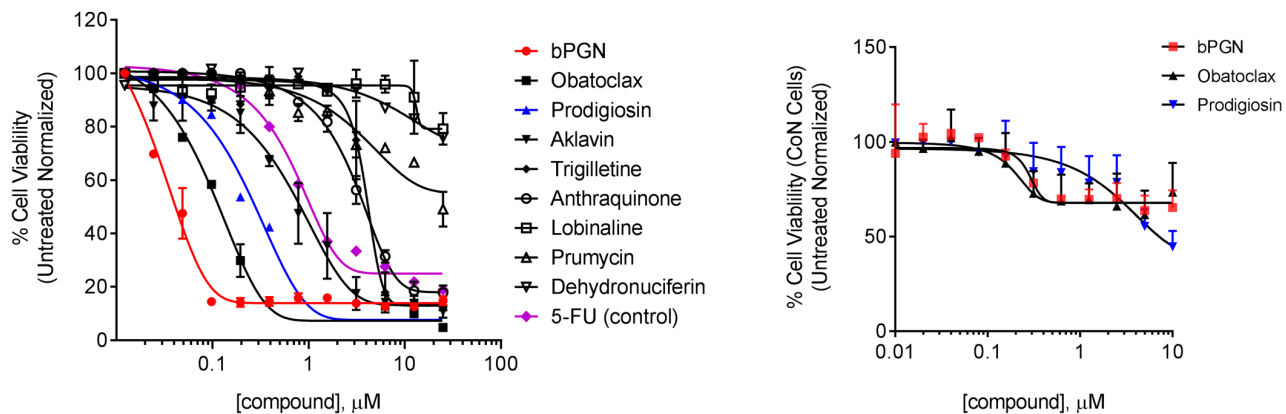

**Figure S2: Cytotoxicity data on select pre-miR-21 modulating compounds, related to Table 1.** HCT-116 cells were treated with 9 DSF-active compounds (0-25  $\mu\text{M}$ ) to determine the 50% minimum growth inhibitory concentration ( $GI_{50}$ ) using a XTT cell viability assay. 5-FU was used as a control. Normal colon cells (ATCC CRL-1790) were also treated with **1**, **2** and **3** ranging from 0 - 10  $\mu\text{M}$  to determine the  $GI_{50}$  using the XTT cell viability assay. All experiments were performed in triplicate.

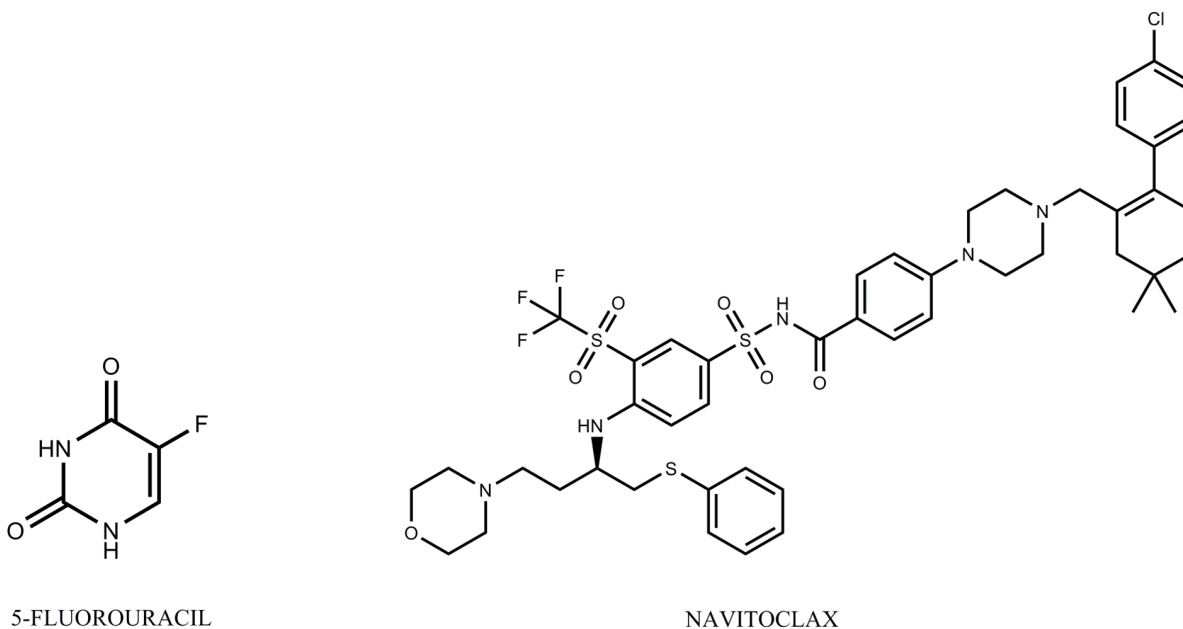

**Figure S3: Chemical structures of control compounds 5-fluorouracil (5-FU) and navitoclax, related to Figure 1 and Table 1.**

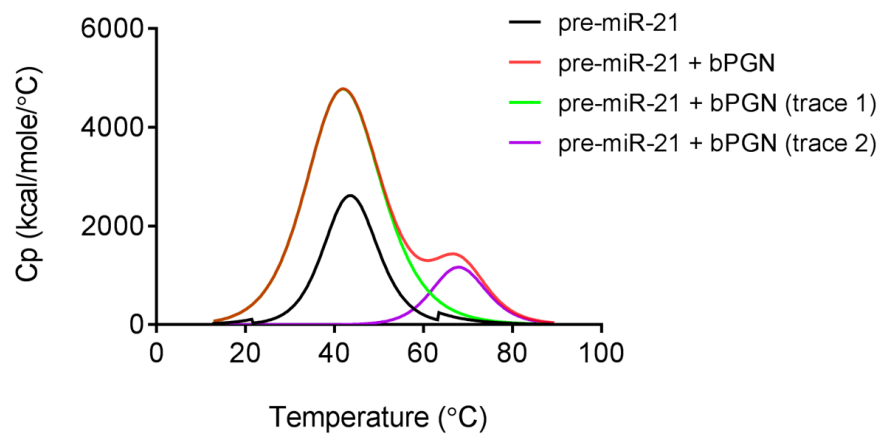

|                      | $T_m$ (°C)      | $\Delta H_{cal}$ (kcal/mol) | $\Delta H_v$ (kcal/mol) |
|----------------------|-----------------|-----------------------------|-------------------------|
| pre-miR-21           | $43.77 \pm 0.1$ | $42.6 \pm 0.5$              | $49.0 \pm 0.8$          |
| pre-miR-21 (trace 1) | $42.3 \pm 0.07$ | $108.1 \pm 0.8$             | $34.9 \pm 0.3$          |
| pre-miR-21 (trace 2) | $68.0 \pm 0.22$ | $19.1 \pm 0.7$              | $56.5 \pm 2.3$          |

**Figure S4: Differential scanning calorimetry of pre-miR-21 (30  $\mu$ M) with or without bPGN (300  $\mu$ M), related to Figure 1. Two distinct thermal curves (trace 1 and 2) are observed after treatment with **1**, indicating the presence of two major species of pre-miR-21.**

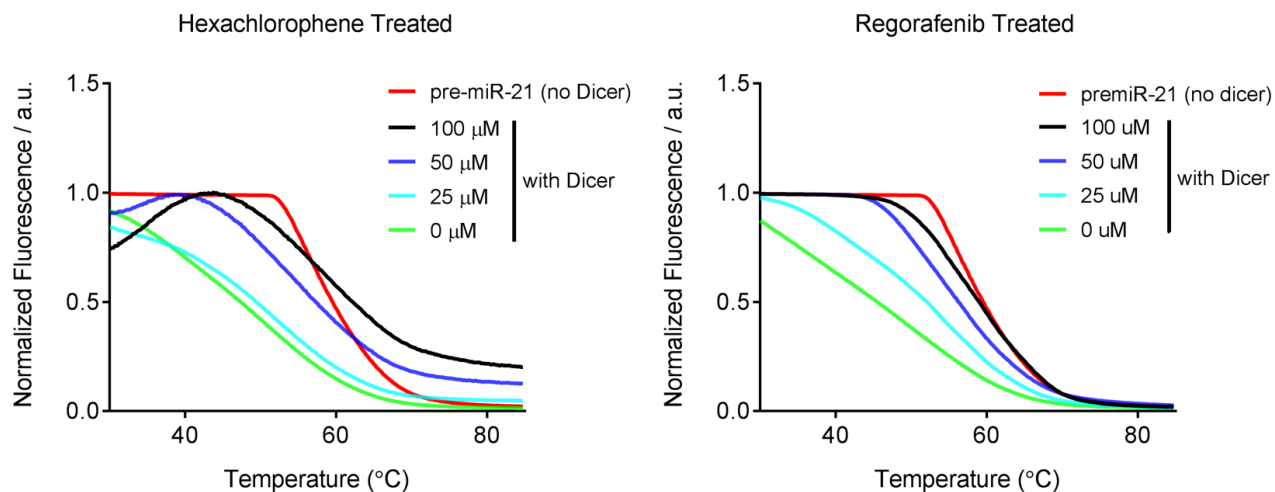

|           | SAMPLE          | $T_m$ (°C) |                 |             |
|-----------|-----------------|------------|-----------------|-------------|
| 10U DICER |                 |            | Hexachlorophene | Regorafenib |
| NO        | miR-21          | 52.4 ± 0.4 |                 |             |
|           | pre-miR-21      | 59.7 ± 0.7 | 59.7 ± 0.7      | 59.6 ± 0.4  |
| YES       | 0 μM compound   |            | 46.7 ± 0.8      | 43.9 ± 0.6  |
|           | 25 μM compound  |            | 49.2 ± 0.1      | 51.3 ± 0.3  |
|           | 50 μM compound  |            | 56.3 ± 0.5      | 56.1 ± 0.3  |
|           | 100 μM compound |            | 61.5 ± 0.7      | 58.9 ± 0.5  |

**Figure S5: Hexachlorophene and regorafenib were previously identified as Dicer inhibitors, related to Figure 3.** Here, we performed a DSF based assay to determine if Dicer (10U) processing of pre-miR-21 (10 μM) is inhibited in the presence of hexachlorophene and regorafenib. The reaction was incubated in 37 °C up to 36 hr, after which RNA was purified and assayed using DSF at 1 μM final RNA concentration.

## Supplemental Tables and Legends

|    | NSC ID# | Assigned Name                                                   | $\Delta T_m$ | Effect       |
|----|---------|-----------------------------------------------------------------|--------------|--------------|
| 1  | 38270   | Olivomycin                                                      | -15.8        | Destabilizer |
| 2  | 3590    | Calcium leucovorin                                              | -14.0        | Destabilizer |
| 3  | 18355   | 2-Pyridin-3-ylacetohydrazide chloride                           | 10.4         | Stabilizer   |
| 4  | 70664   | Heptopyranosylamine                                             | -11.4        | Destabilizer |
| 5  | 76022   | Taspine acetate                                                 | -11.1        | Destabilizer |
| 6  | 86005   | Nogalarol                                                       | -15.7        | Destabilizer |
| 7  | 100290  | Aklavin                                                         | -17.1        | Destabilizer |
| 8  | 106995  | Lomofungin                                                      | 8.62         | Stabilizer   |
| 9  | 107067  | Tirandamycin                                                    | 3.69         | Stabilizer   |
| 10 | 247562  | Butylcycloheptyl prodiginine hydrochloride                      | 3.38         | Stabilizer   |
| 11 | 278619  | Prumycin hydrochloride                                          | 8.41         | Stabilizer   |
| 12 | 356217  | Harmine derivative                                              | -10.8        | Destabilizer |
| 13 | 692259  | tetradecahydronicene-4a-carboxylic acid                         | 5.54         | Stabilizer   |
| 14 | 698298  | Schweinfurthin C                                                | 4.16         | Stabilizer   |
| 15 | 785154  | dehydronuciferine                                               | -15.7        | Destabilizer |
| 16 | 78571   | Tris(3-methyl-1H-indole-2-yl)methane                            | 6.94         | Stabilizer   |
| 17 | 99A051A | Eilatin                                                         | 7.78         | Stabilizer   |
| 18 | 99B014A | Isobatzelline C                                                 | -18.1        | Destabilizer |
| 19 | 99B072A | 3,4,5-tri-O-galloylquinic acid                                  | 4.45         | Stabilizer   |
| 20 | 99B102A | Morin                                                           | -17.4        | Destabilizer |
| 21 | 99B137A | Aclacinomycin A                                                 | -16.9        | Destabilizer |
| 22 | 99B140A | Spectinabilin                                                   | -15.4        | Destabilizer |
| 23 | 49842   | Vinblastine sulfate                                             | -10.2        | Destabilizer |
| 24 | 65104   | Septacidin                                                      | 6.53         | Stabilizer   |
| 25 | 85700   | 5-(2-(1,6-Dimethyl-1lambda(5)-quinolin-2-yl)vinyl)-8-quinolinol | -9.58        | Destabilizer |
| 26 | 102815  | 7-O-Methyl-epi-nogalarol                                        | -17.6        | Destabilizer |
| 27 | 109444  | Lobinaline hydrochloride                                        | -14.0        | Destabilizer |
| 28 | 174280  | Sodium butyrate                                                 | -32.6        | Destabilizer |
| 29 | 181486  | trigilletine                                                    | 5.48         | Stabilizer   |
| 30 | 196524  | eta-Rhodomycinone                                               | -17.0        | Destabilizer |
| 31 | 324368  | ALP                                                             | -12.1        | Destabilizer |
| 32 | 331757  | anthraquinone hydrochloride                                     | 8.71         | Stabilizer   |

**Table S1:** List of 32 active natural products identified from the 3682 natural product compounds screened *via* DSF for modulators of pre-miR-21 thermal stability *in vitro*. Related to Table 1.

| Genes   | log2 Fold Change | p-values |
|---------|------------------|----------|
| ACVR1C  | 2.09             | 0.0439   |
| ACVR2A  | 0.846            | 0.000714 |
| BCL2    | 0                |          |
| CDC25A  | -2.16            | 1.29E-06 |
| CDK6    | 0.878            | 0.00239  |
| CDKN2C  | -1.79            | 0.000103 |
| DUSP8   | 2.18             | 3.30E-06 |
| EFNA2   | -0.339           | 0.0333   |
| FGF18   | 0                |          |
| GNG12   | 0.34             | 0.00837  |
| GPC4    | 0                |          |
| HGF     | 1.45             | 0.00968  |
| IL12A   | 0.876            | 0.000189 |
| IL6R    | 0.425            | 0.0389   |
| JAG1    | 0.204            | 0.0419   |
| LIFR    | 2.26             | 0.000639 |
| MAP3K1  | 0.659            | 0.0149   |
| MAP3K8  | 2.07             | 0.00542  |
| MAPK1   | 0.158            | 0.0118   |
| MAPK10  | 1.26             | 0.0367   |
| MSH2    | -0.665           | 0.0234   |
| MYC     | -0.298           | 0.00686  |
| PBRM1   | 0                |          |
| PIK3R1  | 1.1              | 0.0102   |
| PLD1    | 1.1              | 0.00368  |
| PPP3CA  | 0.429            | 0.0256   |
| PTEN    | 1.15             | 0.000537 |
| RAD21   | -0.556           | 0.0415   |
| RASGRP1 | 1.32             | 0.00164  |
| SKP2    | -1.77            | 2.53E-06 |
| SPRY1   | 0                |          |
| SPRY2   | 0.292            | 0.0465   |
| SPRY4   | 0.669            | 6.06E-05 |
| STAG2   | 0.875            | 0.00504  |
| STAT3   | 0.823            | 2.14E-05 |
| TGFB1   | 0.171            | 0.0208   |
| TGFB2   | 0                |          |
| TGFBR2  | 0.255            | 0.0203   |
| VHL     | 0.572            | 0.000286 |
| WNT2B   | 2.35             | 0.000213 |
| SOS2    | 1.87             | 2.43E-05 |

**Table S2: 41 predicted miR-21 target genes annotated from NanoString analysis. Related to Figure 5.** Most notably, miR-21 target genes that are reported to play a role in suppressing cellular proliferation such as *PTEN*, *STAT3*, and *SPRY2* were all significantly upregulated by bPGN.
